# Supplementary material for: Integrative, In Silico and Comparative Analysis of Breast Cancer Secretome Highlights Invasive-Ductal-Carcinoma-Grade Progression Biomarkers
Source: Cancers (Basel). 2022 Aug 9;14(16):3854. doi: 10.3390/cancers14163854 (PMC9406168; doi:10.3390/cancers14163854)
Supplement: Supplementary file 1 [file cancers-14-03854-s001.zip › cancers-1828998-supplementary.pdf]

# Integrative, In Silico and Comparative Analysis of Breast Cancer Secretome Highlights Inva-sive-Ductal-Carcinoma-Grade Progression Biomarkers

Stavroula L. Kastora <sup>1,2\*</sup>, Georgios Kounidas <sup>1</sup>, Valerie Speirs <sup>1</sup> and Yazan A. Masannat <sup>1,2</sup>

## Supplementary Materials

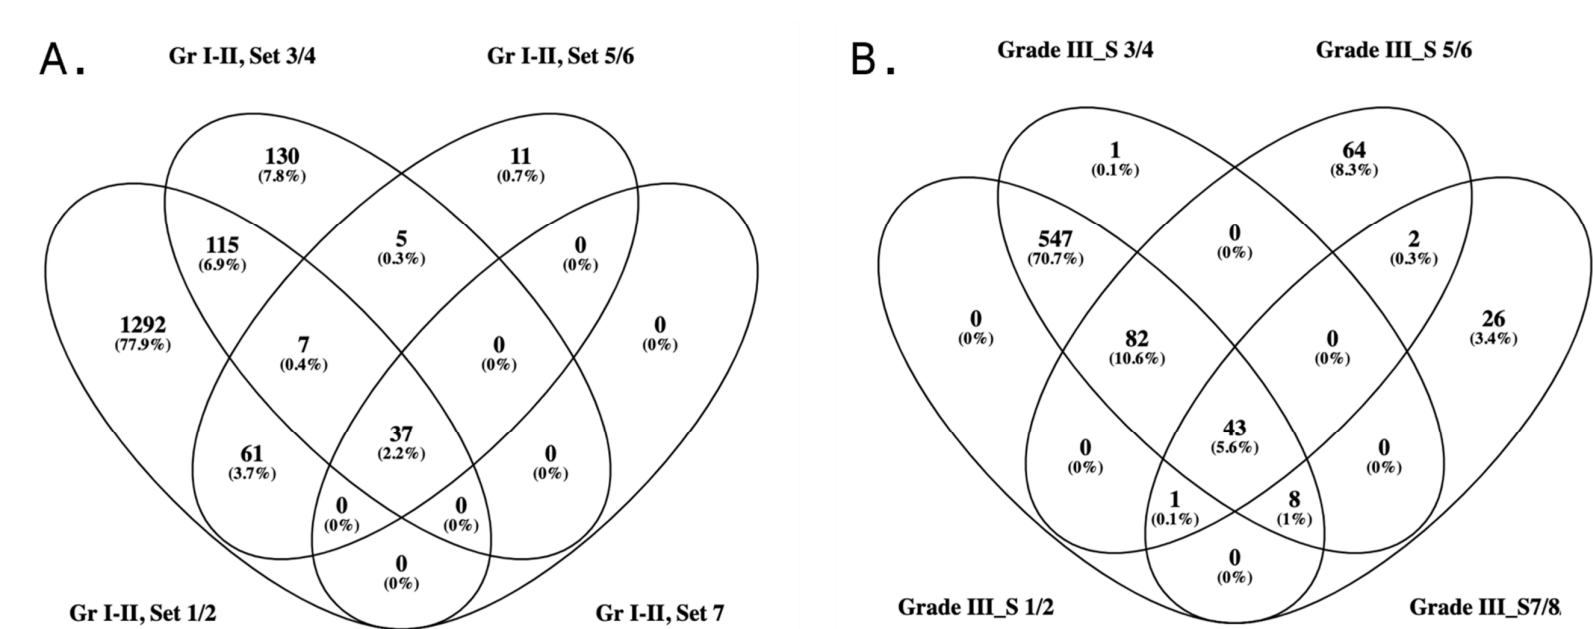

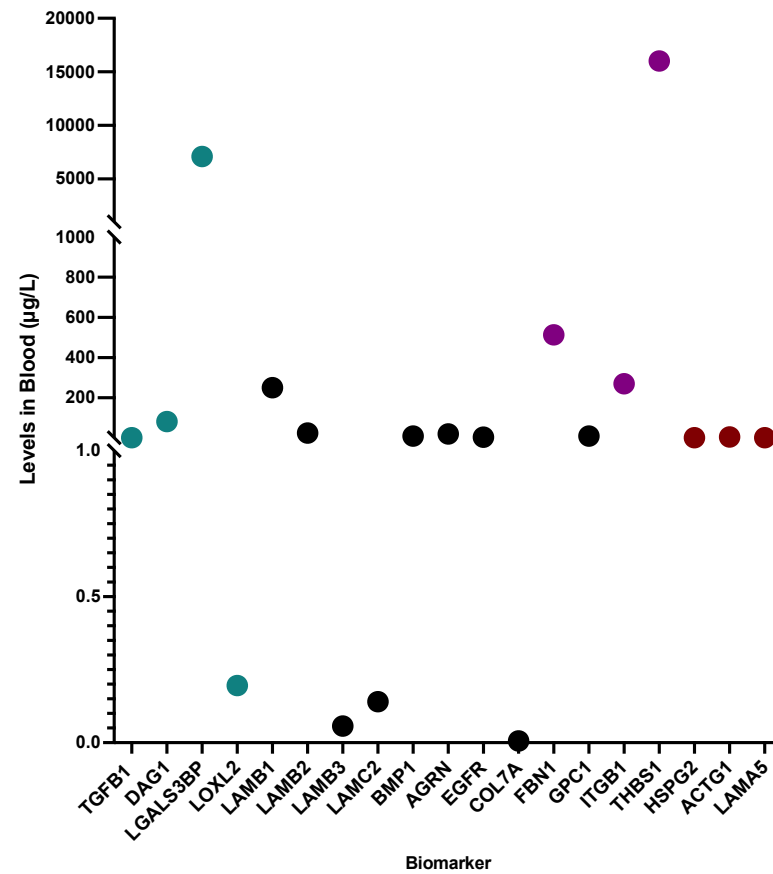

**Figure S2.** Blood levels of selected biomarkers (micrograms/Litre). DCIS to IDC progression biomarkers; TGFB1, DAG1, LGALS3BP, LOXL2 (Teal). IDC grade progression; HSPG2, ACTG1 and LAMA5 (Plum), Pan-cancer biomarkers; ITGB1, FBN1 and THBS1 (Cayenne).

**Table S1.** Datasets included in the breast cancer secretome comparative analysis.

| Title                                                                                                                                                                                | Author                | ProtCode         | Cancer        | Cell line                                | Equipment     |
|--------------------------------------------------------------------------------------------------------------------------------------------------------------------------------------|-----------------------|------------------|---------------|------------------------------------------|---------------|
| Integrative analysis of mesenchymal stromal cell conversion by breast cancer secretomes in blank slate 3D microenvironments                                                          | Blache et al.         | PXD010467        | Breast cancer | MCF-7, MDA-MB-231                        | IC-MS         |
| Differential proteomic comparison of the breast cancer secretome using a quantitative paired analysis workflow                                                                       | <u>Brunoro et al.</u> | PXD005157        | Breast cancer | <b>Patient samples (ER positive)</b>     | IC-MS; LIT-MS |
| Breast Cancer Metastasis Organotropism                                                                                                                                               | <u>Zhuang et al.</u>  | <u>PXD007227</u> | Breast cancer | MDA-MB-231                               | LIT-MS        |
| MDA-MB-231 Breast Cancer Bone Tropic vs Parental Hypoxic Secretome Analysis                                                                                                          | <u>Cox et al.</u>     | <u>PXD000397</u> | Breast cancer | MDA-MB-231                               | IC-MS         |
| Novel secretome-to-transcriptome integrated or secreto-transcriptomic approach to reveal liquid biopsy biomarkers for predicting individualized prognosis of breast cancer patients. | Ankney et al.         | -                | Breast cancer | MCF10A, MCF7, MDA-231, T47D, and HCC1806 | Tribid-MS     |

|                                                                                                                            |                        |           |               |                                                                                         |       |
|----------------------------------------------------------------------------------------------------------------------------|------------------------|-----------|---------------|-----------------------------------------------------------------------------------------|-------|
| Quantification of the N-glycosylated secretome by super-SILAC during breast cancer progression and in human blood Samples. | Boersema et al.        | -         | Breast cancer | HMT-3522-S1; MFM223; HCC202, HCC2218; HCC1143, HCC1937, HCC1599; MCF-10a and MDA-MB-453 | SILAC |
| Differential secretome analysis reveals CST6 as a suppressor of breast cancer bone metastasis.                             | Jin et al.,            | -         | Breast cancer | MCF10; MDA231                                                                           | IC-MS |
| Spontaneous regression of micro-metastases following primary tumor excision: a critical role for primary tumor secretome   | <u>Shaashua et al.</u> | PXD008384 | Breast cancer | MDA-MB-231                                                                              | IC-MS |

IC-MS Ion Chromatography Mass Spectrometry; LIT-MS linear ion trap Mass Spectrometry; SILAC Stable isotope labeling by amino acid in cell culture; Tribrid-MS: quadrupole, ion trap and Orbitrap mass analysis

**Table S2.** Datasets included in other cancer secretome comparative analysis.

| <b>Title</b>                                                                                                                                        | <b>Author</b>                          | <b>ProtCode</b>                  | <b>Cancer origin</b>     | <b>Cell line</b>                                                                                                          | <b>Equipment</b>  |
|-----------------------------------------------------------------------------------------------------------------------------------------------------|----------------------------------------|----------------------------------|--------------------------|---------------------------------------------------------------------------------------------------------------------------|-------------------|
| Multi-layered proteomic analysis for colorectal cancer                                                                                              | Kwon et al.                            | <a href="#"><u>PXD018304</u></a> | Colorectal cancer        | <b>Patient samples</b>                                                                                                    | IC-MS; LIT-MS     |
| In-depth characterization of the secretome of colorectal cancer metastatic cells identifies key proteins in cell adhesion, migration, and invasion. | Barderas et al.                        | <a href="#"><u>PXD030671</u></a> | Colorectal cancer        | KM12C KM12SM; KM12L4a SW480; SW620                                                                                        | Q Exactive HF     |
| Characterization of phosphoproteins in gastric cancer secretome.                                                                                    | Yan et al.                             | <a href="#"><u>PXD002674</u></a> | Gastric cancer           | <b>Patient samples</b> (ERBB2 positive & negative)                                                                        | LIT-MS            |
| Identification of CHI3L1 and MASP2 as a biomarker pair for liver cancer through integrative secretome and transcriptome analysis.                   | Wang J et al.                          | <a href="#"><u>PXD025623</u></a> | Hepatocellular carcinoma | Huh-7                                                                                                                     | LC-MS             |
| PPARgamma regulates a cell-to-cell communication program in human methastatic melanoma cells                                                        | <a href="#"><u>Pich et al.</u></a>     | <a href="#"><u>PXD009108</u></a> | Melanoma                 | A375, SkMel28                                                                                                             | Tribrid-MS; LC-MS |
| Human melanoma cell lines secretome analysis                                                                                                        | <a href="#"><u>Liberato et al.</u></a> | PXD007265                        | Melanoma                 | Hs 895.T (CRL-7636 <sup>TM</sup> ), Hs 895.Sk (CRL-7637 <sup>TM</sup> ), A375, (CRL-1619 <sup>TM</sup> ), SH-4 (CRL-7724) | LIT-MS            |

|                                                                                                                                                                      |                                |                  |                                |                                                                              |               |
|----------------------------------------------------------------------------------------------------------------------------------------------------------------------|--------------------------------|------------------|--------------------------------|------------------------------------------------------------------------------|---------------|
| Secretome analysis of human A549 Lung cancer cells harboring LKB1 mutations.                                                                                         | <u>Granado-Martinez et al.</u> | <u>PXD018041</u> | Lung cancer<br><b>Melanoma</b> | A549 lung cancer cells, G361 melanoma (Raw data available only for melanoma) | LIT-MS        |
| Proteome Analysis of Non-Small Cell Lung Cancer Cell Line Secretomes and Patient Sputum Reveals Biofluid Biomarker Candidates for Cisplatin Response Prediction      | <u>Bottger et al.</u>          | <u>PXD011315</u> | NSCLC                          | W1573, H2228, H522, H1650, H1975 and H1703                                   | LIT-MS; LC-MS |
| Importin subunit alpha-2 is identified as a potential biomarker for non-small cell lung cancer by integration of the cancer cell secretome and tissue transcriptome. | Wang et al.,                   | <u>PXD000861</u> | NSCLC                          | PC9                                                                          | LIT-MS        |
| Cytokine-induced GBP1 release from human ovarian cancer cells                                                                                                        | <u>Carbotti et al.</u>         | <u>PXD016479</u> | Ovarian cancer                 | SKOV3 , OVCAR5, IGROV1, IST-A161                                             | Tribrid-MS    |
| Ovarian high grade serous carcinoma ascites cell secretome                                                                                                           | <u>Worzfeld et al.</u>         | PXD008047        | Ovarian cancer                 | <b>Patient samples with HGSOC</b>                                            | LC-MS         |
| Analysis of ovarian cancer cell secretome during epithelial to mesenchymal transition reveals a protein signature associated with advanced stages of ovarian tumors. | Lanfredi et al.                | PXD022040        | Ovarian cancer                 | Caov-3                                                                       | LC-MS         |
| Integration of Two In-depth Quantitative Proteomics Approaches Determines the Kallikrein-related                                                                     | Silva et al.                   | PXD003752        | Ovarian cancer                 | OVMZ-6, SKOV-3                                                               | SILAC         |

|                                                                                                                 |                  |                                           |                   |                                   |        |
|-----------------------------------------------------------------------------------------------------------------|------------------|-------------------------------------------|-------------------|-----------------------------------|--------|
| Peptidase 7 (KLK7) Degradome in Ovarian Cancer Cell Secretome.                                                  |                  |                                           |                   |                                   |        |
| MYB-regulated pancreatic cancer secretome                                                                       | Zubair et al.    | <a href="#">PXD015126</a>                 | Pancreatic cancer | BxPC3-MYB                         | LIT-MS |
| Secretome protein signature of human pancreatic cancer stem-like cells.                                         | Brandi et al.    | Full dataset available online S. material | Pancreatic cancer | Panc1                             | LC-MS  |
| Secretome-based identification of ULBP2 as a novel serum marker for pancreatic cancer detection.                | Chang et al.     | Full dataset available online S. material | Pancreatic cancer | BxPC-3, MIA PaCa-2, Panc1, AsPC-1 | LC-MS  |
| Characterization of soluble and exosomal forms of the EGFR released from pancreatic cancer cells.               | Adamczyk et al., | Full dataset available online S. material | Pancreatic cancer | BxPC3, MiaPaca2, Panc1            | ESI-MS |
| Proteomics approach to identify novel metastatic bone markers from the secretome of PC-3 prostate cancer cells. | Sung et al.,     | Full dataset available online S. material | Prostate cancer   | PC-3                              | LC-MS  |

IC-MS: Ion Chromatography Mass Spectrometry; LIT-MS: linear ion trap Mass Spectrometry; SILAC: Stable isotope labelling by amino acid in cell culture; Tribrid-MS: quadrupole, ion trap and Orbitrap mass analysis; ESI-MS: **electrospray ionization mass spectrometry**

**Table S3.** Cell lines used in breast cancer and other malignancy integrative and comparative analysis. (accessed on the 26th of July, 2022)

| Cell strains |                                                                     |
|--------------|---------------------------------------------------------------------|
| MCF10A       | Non-malignant breast cell line; benign fibrocystic disease          |
| MDA-231      | Invasive ductal carcinoma Grade II                                  |
| MCF7         | Invasive ductal carcinoma Grade III                                 |
| T47D         | Invasive ductal carcinoma Grade II                                  |
| HMT-3522-S1  | Benign breast tumour                                                |
| MFM223       | Invasive ductal carcinoma, Grade III                                |
| HCC202       | Invasive ductal carcinoma, Grade III, ER-, PR-                      |
| HCC2218      | Invasive ductal carcinoma, Grade III, ER-, HER2+                    |
| HCC1143      | Invasive ductal carcinoma, Grade III, Triple -                      |
| HCC1937      | Invasive ductal carcinoma, Grade III, BRCA1 mutant, Triple negative |
| HCC1599      | Invasive ductal carcinoma, Grade III, Triple negative               |
| MDA-MB-453   | Invasive ductal carcinoma Grade III                                 |
| PC-3         | Metastatic Grade IV prostate cancer                                 |
| MiaPaca2     | Invasive Pancreatic adenocarcinoma, Grade not stated                |
| Panc1        | Invasive Pancreatic epithelioid Carcinoma, Grade not stated         |
| AsPC-1       | Invasive Pancreatic adenocarcinoma, Grade not stated                |
| MIA PaCa-2   | Invasive Pancreatic epithelioid Carcinoma, Grade not stated         |
| BxPC3-MYB    | Invasive Pancreatic adenocarcinoma, Grade not stated                |
| OVMZ-6       | Invasive ovarian serous cystadenocarcinoma, Grade IV                |
| SKOV-3       | Invasive ovarian adenocarcinoma, Grade IV                           |
| Caov-3       | High grade ovarian serous adenocarcinoma, Grade III                 |
| OVCAR5       | High grade ovarian serous adenocarcinoma, Grade IV                  |
| IGROV1       | Ovarian endometrioid adenocarcinoma, Grade not stated               |
| IST-A161     | Pleural epithelioid mesothelioma, Grade not stated                  |
| PC9          | Lung adenocarcinoma, Grade not stated                               |

|                       |                                                      |
|-----------------------|------------------------------------------------------|
| H1703                 | Lung squamous cell carcinoma, Grade I                |
| W1573                 | Lung adenocarcinoma, Grade I                         |
| H2228                 | Non-small cell lung adenocarcinoma, Grade not stated |
| H522                  | Non-small cell lung adenocarcinoma, Stage 2          |
| H1650                 | Bronchoalveolar lung adenocarcinoma, Stage 3B        |
| H1975                 | Non-small cell lung adenocarcinoma, Grade not stated |
| H1703                 | Non-small cell lung adenocarcinoma, Grade not stated |
| Huh-7                 | Hepatocellular adenocarcinoma, Grade not stated      |
| G361                  | Melanoma, Grade not stated                           |
| Hs 895.T (CRL-7636™)  | Melanoma, Grade not stated                           |
| Hs 895.Sk (CRL-7637™) | Benign, Fibroblast control                           |
| A375 (CRL-1619™)      | Melanoma, Grade not stated                           |
| SH-4 (CRL-7724)       | Melanoma, Grade not stated                           |
| SkMel28               | Melanoma, Grade not stated                           |
| KM12C                 | Colon adenocarcinoma, Grade not stated               |
| KM12SM                | Colon adenocarcinoma, Grade not stated               |
| KM12L4a               | Colon adenocarcinoma, Grade not stated               |
| SW480                 | Colon adenocarcinoma, Grade not stated               |
| SW620                 | Colon adenocarcinoma, Grade not stated               |

ER: Estrogen receptor; PR: Progesterone receptor; HER2: Receptor tyrosine-protein kinase erbB-2, Neu/ERBB2.

**Table S4.** Human Protein Atlas prognosis and biological process of BC and comparative cancer patients for proteins identified in grade I and II BC vs. grade III BC clusters.

|                      | Protein  | Name                             | Biological Process (UniProt)                   | Prognosis                                                                     | Specificity                        | Predicted location                | Detected in Secretome Dataset | Novel secreted function ? |
|----------------------|----------|----------------------------------|------------------------------------------------|-------------------------------------------------------------------------------|------------------------------------|-----------------------------------|-------------------------------|---------------------------|
| Grade I-II increased | LGALS3BP | Galectin 3 binding protein       | Cell adhesion                                  | Unfavourable                                                                  | Low_All                            | Secreted                          | Secreted                      | No                        |
| Grade I-II increased | LAMB2    | Laminin subunit beta 2           | Cell adhesion                                  | Unknown                                                                       | Low_All                            | Membrane, Secreted                | Secreted                      | No                        |
| Grade I-II increased | BMP1     | Bone morphogenetic protein 1     | Chondrogenesis , Differentiation, Osteogenesis | Prognostic marker in renal cancer (unfavourable)                              | Low_All                            | Secreted                          | Secreted                      | No                        |
| Grade I-II increased | LAMB1    | Laminin subunit beta 1           | Cell adhesion                                  | Unfavourable                                                                  | Low_All                            | Intracellular, Secreted           | Secreted                      | No                        |
| Grade I-II increased | AGRN     | Agrin                            | Differentiation                                | Unfavourable                                                                  | Low_All                            | Intracellular, Secreted           | Secreted                      | No                        |
| Grade I-II increased | LAMC2    | Laminin subunit gamma 2          | Cell adhesion                                  | Unfavourable                                                                  | Medium_Many_Specific Head and Neck | Secreted                          | Secreted                      | No                        |
| Grade I-II increased | EGFR     | Epidermal growth factor receptor | Host-virus interaction                         | Unfavourable                                                                  | Medium_Many_Specific Glioma        | Intracellular, Membrane, Secreted | Secreted                      | No                        |
| Grade I-II increased | LAMB3    | Laminin subunit beta 3           | Cell adhesion                                  | Prognostic marker in renal cancer (unfavourable), lung cancer (unfavourable), | Medium_Many_Specific               | Intracellular, Secreted           | Secreted                      | No                        |

|                      |        |                                         |                                             |                                                                                                                                                         |                                    |                                   |          |     |
|----------------------|--------|-----------------------------------------|---------------------------------------------|---------------------------------------------------------------------------------------------------------------------------------------------------------|------------------------------------|-----------------------------------|----------|-----|
|                      |        |                                         |                                             | pancreatic cancer (unfavourable) and breast cancer (favorable)                                                                                          | Head and Neck                      |                                   |          |     |
| Grade I-II increased | LAMC1  | Laminin subunit gamma 1                 | Cell adhesion                               | Unfavourable                                                                                                                                            | Low_All                            | Intracellular, Secreted           | Secreted | No  |
| Grade I-II increased | COL7A1 | Collagen type VII alpha 1 chain         | Cell adhesion                               | Prognostic marker in pancreatic cancer (unfavourable) and head and neck cancer (favorable)                                                              | Medium_Many_Specific Head and Neck | Intracellular, Secreted           | Secreted | No  |
| Grade I-II increased | GPC1   | Glypican 1                              | -                                           | Prognostic marker in liver cancer (unfavourable), colorectal cancer (unfavourable) and endometrial cancer (unfavourable)                                | Low_All                            | Intracellular, Membrane, Secreted | Secreted | Yes |
| Grade III increased  | TGFBI  | Transforming growth factor beta induced | Cell adhesion, Sensory transduction, Vision | Prognostic marker in renal cancer (unfavourable), cervical cancer (unfavourable), ovarian cancer (unfavourable) and endometrial cancer (favorable)      | Low_All                            | Intracellular, Secreted           | Secreted | No  |
| Grade III increased  | CTSV   | Cathepsin V                             | Angiogenesis                                | Prognostic marker in liver cancer (unfavourable), urothelial cancer (unfavourable), pancreatic cancer (unfavourable) and endometrial cancer (favorable) | Low_All                            | Intracellular, Secreted           | Secreted | No  |

|                     |       |                                      |                                                                                                                                                  |                                                                                                                                                     |         |                                  |          |    |
|---------------------|-------|--------------------------------------|--------------------------------------------------------------------------------------------------------------------------------------------------|-----------------------------------------------------------------------------------------------------------------------------------------------------|---------|----------------------------------|----------|----|
| Grade III increased | HSPG2 | Heparan sulfate proteoglycan 2       | -                                                                                                                                                | Prognostic marker in lurothelial cancer (unfavourable),                                                                                             | Low_All | Secreted to ECM                  | Secreted | No |
| Grade III increased | THSB1 | Thrombospondin 1                     | Cell adhesion, Unfolded protein response                                                                                                         | Prognostic marker in renal cancer (unfavourable) and stomach cancer (unfavourable)                                                                  | Low_All | Secreted                         | Secreted | No |
| Grade III increased | LDLR2 | Low density lipoprotein receptor     | Cholesterol metabolism, Endocytosis, Host-virus interaction, Lipid metabolism, Lipid transport, Steroid metabolism, Sterol metabolism, Transport | Prognostic marker in pancreatic cancer (unfavourable), urothelial cancer (unfavourable) and renal cancer (unfavourable)                             | Low_All | Intracellular, Membrane Secreted | Secreted | No |
| Grade III increased | ACTG1 | Actin gamma 1                        | -                                                                                                                                                | Prognostic marker in colorectal cancer (favourable)                                                                                                 | Low_All | Intracellular, Secreted          | Secreted | No |
| Grade III increased | VEGFA | Vascular endothelial growth factor A | Angiogenesis, Differentiation                                                                                                                    | Prognostic marker in renal cancer (unfavourable), liver cancer (unfavourable), endometrial cancer (unfavourable), urothelial cancer (favorable) and | Low_All | Intracellular, Secreted          | Secreted | No |

|                                             |       |                                                          |                                                     |                                                                                                                      |         |                                   |          |     |
|---------------------------------------------|-------|----------------------------------------------------------|-----------------------------------------------------|----------------------------------------------------------------------------------------------------------------------|---------|-----------------------------------|----------|-----|
|                                             |       |                                                          |                                                     | cervical cancer<br>(unfavourable)                                                                                    |         |                                   |          |     |
| Grade III increased                         | LTBP1 | Latent transforming growth factor beta binding protein 1 | -                                                   | Prognostic marker in renal cancer (unfavourable) and urothelial cancer (unfavourable)                                | Low_All | Intracellular, Secreted           | Secreted | No  |
| Common in all adeno+BC (more in Grade I/II) | FBN1  | Fibrillin 1                                              | -                                                   | Prognostic marker in renal cancer (unfavourable), urothelial cancer (unfavourable) and stomach cancer (unfavourable) | Low_All | Secreted                          | Secreted | No  |
| Grade III increased                         | DAG1  | Dystroglycan 1                                           | Host-virus interaction                              | Prognostic marker in renal cancer (favorable)                                                                        | Low_All | Intracellular, Membrane Secreted  | Secreted | No  |
| Common in all adeno+BC (more in Grade III)  | ITGB1 | Integrin subunit beta 1                                  | Cell adhesion, Host-virus interaction               | Unfavourable                                                                                                         | Low_All | Intracellular, Membrane, Secreted | Secreted | No  |
| Grade III increased                         | MET   | MET proto-oncogene, receptor tyrosine kinase             | -                                                   | Prognostic marker in pancreatic cancer (unfavourable) and head and neck cancer (unfavourable)                        | Low_All | Intracellular, Membrane, Secreted | Secreted | No  |
| Grade III increased                         | CTCL  | TSPY like 2                                              | Cell cycle, Transcription, Transcription regulation | Prognostic marker in pancreatic cancer (favorable), renal cancer (unfavourable) and colorectal cancer (unfavourable) | Low_All | Intracellular                     | Secreted | Yes |

|                     |       |                                  |                                                                     |                                                                                                                                                                                        |                                     |                         |          |    |
|---------------------|-------|----------------------------------|---------------------------------------------------------------------|----------------------------------------------------------------------------------------------------------------------------------------------------------------------------------------|-------------------------------------|-------------------------|----------|----|
| Grade III increased | LAMA5 | Laminin subunit alpha 5          | -                                                                   | Unknown                                                                                                                                                                                | Unknown                             | Intracellular, Secreted | Secreted | No |
| Grade III increased | FN1   | Fibronectin 1                    | Acute phase, Angiogenesis, Cell adhesion, Cell shape                | Prognostic marker in renal cancer (unfavourable), stomach cancer (unfavourable) and urothelial cancer (unfavourable)                                                                   | Medium_Many_Specific thyroid cancer | Intracellular, Secreted | Secreted | No |
| Grade III increased | SDC4  | Syndecan 4                       | -                                                                   | Prognostic marker in renal cancer (favorable), thyroid cancer (favorable) and pancreatic cancer (unfavourable)                                                                         | Low_All                             | Membrane, Secreted      | Secreted | No |
| Grade III increased | PLAU  | Plasminogen activator, urokinase | Blood coagulation, Fibrinolysis, Hemostasis, Plasminogen activation | Prognostic marker in pancreatic cancer (unfavourable), head and neck cancer (unfavourable), endometrial cancer (favorable), renal cancer (unfavourable) and lung cancer (unfavourable) | Low_All                             | Intracellular, Secreted | Secreted | No |
| Grade III increased | LOXL2 | Lysyl oxidase like 2             | Transcription, Transcription regulation                             | Prognostic marker in lung cancer (unfavourable), renal cancer (unfavourable), cervical cancer (unfavourable), glioma (unfavourable) and pancreatic cancer (unfavourable)               | Low_All                             | Intracellular, Secreted | Secreted | No |

**Table S5.** Blood levels of selected biomarkers.

| <b>initial_alias</b> | <b>converted_alias</b> | <b>description</b>                                                    | <b>Confirmed in<br/>Human Protein<br/>Atlas</b> | <b>Blood<br/>concentration<br/>(micrograms/L)</b> |
|----------------------|------------------------|-----------------------------------------------------------------------|-------------------------------------------------|---------------------------------------------------|
| TGFB1                | ENSG00000105329        | transforming growth factor beta 1 [Source:HGNC Symbol;Acc:HGNC:11766] | Secreted                                        | 1.3                                               |
| DAG1                 | ENSG00000173402        | dystroglycan 1 [Source:HGNC Symbol;Acc:HGNC:2666]                     | Secreted                                        | 84                                                |
| LGALS3BP             | ENSG00000108679        | Galectin 3 binding protein                                            | Secreted                                        | 7100                                              |
| LOXL2                | ENSG00000134013        | lysyl oxidase like 2 [Source:HGNC Symbol;Acc:HGNC:6666]               | Secreted                                        | 0.193                                             |
| LAMB1                | ENSG00000091136        | laminin subunit beta 1 [Source:HGNC Symbol;Acc:HGNC:6486]             | Secreted                                        | 250                                               |
| LAMB2                | ENSG00000172037        | laminin subunit beta 2 [Source:HGNC Symbol;Acc:HGNC:6487]             | Secreted                                        | 25                                                |
| LAMB3                | ENSG00000196878        | laminin subunit beta 3 [Source:HGNC Symbol;Acc:HGNC:6490]             | Secreted                                        | 0.02                                              |
| LAMC2                | ENSG00000058085        | laminin subunit gamma 2 [Source:HGNC Symbol;Acc:HGNC:6493]            | Secreted                                        | 0.13                                              |
| BMP1                 | ENSG00000168487        | bone morphogenetic protein 1 [Source:HGNC Symbol;Acc:HGNC:1067]       | Secreted                                        | 9.2                                               |
| AGRN                 | ENSG00000188157        | agrin [Source:HGNC Symbol;Acc:HGNC:329]                               | Secreted                                        | 20                                                |
| EGFR                 | ENSG00000146648        | epidermal growth factor receptor [Source:HGNC Symbol;Acc:HGNC:3236]   | Secreted                                        | 4.7                                               |
| COL7A                | ENSG00000114270        | Collagen type VII alpha 1 chain                                       | Secreted                                        | 0.006                                             |
| FBN1                 | ENSG00000166147        | fibrillin 1 [Source:HGNC Symbol;Acc:HGNC:3603]                        | Secreted                                        | 520                                               |
| GPC1                 | ENSG00000063660        | glypican 1 [Source:HGNC Symbol;Acc:HGNC:4449]                         | Secreted                                        | 9.5                                               |
| ITGB1                | ENSG00000150093        | integrin subunit beta 1 [Source:HGNC Symbol;Acc:HGNC:6153]            | Secreted                                        | 270                                               |
| THBS1                | ENSG00000137801        | thrombospondin 1 [Source:HGNC Symbol;Acc:HGNC:11785]                  | Secreted                                        | 16000                                             |
| HSPG2                | ENSG00000142798        | Heparan sulfate proteoglycan 2 [Source:HGNC Symbol;Acc:HGNC:3339]     | Secreted                                        | 1.4                                               |
| ACTG1                | ENSG00000184009        | Actin gamma 1 [Source:HGNC Symbol;Acc:HGNC:63261]                     | Secreted                                        | 4.9                                               |
| LAMA5                | ENSG00000130702        | Laminin subunit alpha 5 [Source:HGNC Symbol;Acc:HGNC:3911]            | Secreted                                        | 1.8                                               |

**Table S6.** Abbreviation list

| Abbreviation |                                                |
|--------------|------------------------------------------------|
| BC           | Breast Cancer                                  |
| IDC          | Infiltrating Ductal Carcinoma                  |
| ILC          | Infiltrating Lobular Carcinoma                 |
| MDLC         | Mixed Ductal/Lobular Carcinoma                 |
| DCIS         | Ductal Carcinoma In Situ                       |
| ER           | Estrogen Receptor                              |
| PR           | Progesterone Receptor                          |
| HER2         | Human Epidermal Growth Factor Receptor 2       |
| TNBC         | Triple negative Breast cancer                  |
| Ki-67        | Marker Of Proliferation Ki-67                  |
| PIK3CA       | Phosphatidylinositol 4,5-Bisphosphate 3-Kinase |
| TP53         | Tumour Protein P53                             |
| ECM          | Extracellular matrix                           |
| LGALS3BP     | Galectin 3 Binding Protein                     |
| LAMB2        | Laminin Subunit Beta 2                         |
| BMP1         | Bone Morphogenetic Protein 1                   |
| LAMB1        | Laminin Subunit Beta 1                         |
| AGRN         | Agrin                                          |
| LAMC2        | Laminin Subunit Gamma 2                        |
| LAMB3        | Laminin Subunit Beta 3                         |
| EGFR         | Epidermal Growth Factor Receptor               |
| LAMC1        | Laminin Subunit Gamma 1                        |
| FBN1         | Fibrillin 1                                    |
| COL7A1       | Collagen Type VII Alpha 1 Chain                |
| GPC1         | Glypican 1                                     |

|             |                                                                                          |
|-------------|------------------------------------------------------------------------------------------|
| TGFB1       | Transforming Growth Factor Beta 1                                                        |
| CTSV        | Cathepsin V                                                                              |
| HSPG2       | Heparan Sulfate Proteoglycan 2                                                           |
| THBS1       | Thrombospondin 1                                                                         |
| LDLR        | Low Density Lipoprotein Receptor                                                         |
| ACTG1       | Actin Gamma 1                                                                            |
| VEGFA       | Vascular Endothelial Growth Factor A                                                     |
| LTBP1       | Latent Transforming Growth Factor Beta Binding Protein 1                                 |
| FN1         | Fibronectin 1                                                                            |
| DAG1        | Dystroglycan 1                                                                           |
| ITGB1       | Integrin Subunit Beta 1                                                                  |
| MET         | MET Proto-Oncogene, Receptor Tyrosine Kinase                                             |
| CTSL        | Cathepsin L                                                                              |
| LAMA5       | Laminin Subunit Alpha 5                                                                  |
| SDC4        | Syndecan 4                                                                               |
| PLAU or uPA | Plasminogen Activator, Urokinase                                                         |
| LOXL2       | Lysyl Oxidase Like 2                                                                     |
| PI3K-Akt    | Phosphatidylinositol-4,5-Bisphosphate 3-Kinase /AKT<br>Serine/Threonine Kinase 1 pathway |
| NSCLC       | Non-small cell lung cancer                                                               |
| CRC         | Colorectal cancer                                                                        |
| P           | P value                                                                                  |
| HR          | Hazard Ratio                                                                             |
| CI          | Confidence Interval                                                                      |

|       |                                                               |
|-------|---------------------------------------------------------------|
| KEGG  | Kyoto Encyclopaedia of Genes and Genomes                      |
| ELK1  | ETS Transcription Factor ELK1                                 |
| MYC   | MYC Proto-Oncogene, BHLH Transcription Factor                 |
| MAX   | MYC Associated Factor X                                       |
| mTOR  | Mechanistic Target Of Rapamycin Kinase                        |
| SRBP1 | Insig-Srebp-Scap                                              |
| PCSK9 | Proprotein Convertase Subtilisin/Kexin Type 9                 |
| hAG   | Anterior Gradient, Protein Disulphide Isomerase Family Member |
| FPKM  | Fragments per kilobase of exon per million reads mapped       |
